# Supplementary material for: The Histone Deacetylase Inhibitor Romidepsin Spares Normal Tissues While Acting as an Effective Radiosensitizer in Bladder Tumors in Vivo
Source: PubMed Central journal article supplement (PMC7181176; doi:10.1016/j.ijrobp.2020.01.015), 2020-05-01

Supplementary figure 1

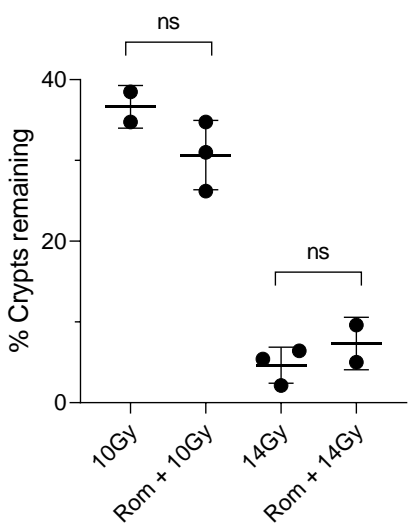

Supplement: mmc1.pdf [file mmc1.pdf]
