# Supplementary material for: The Histone Deacetylase Inhibitor Romidepsin Spares Normal Tissues While Acting as an Effective Radiosensitizer in Bladder Tumors in Vivo
Source: PubMed Central journal article supplement (PMC7181176; doi:10.1016/j.ijrobp.2020.01.015), 2020-05-01

# Supplementary figure 2

**A**

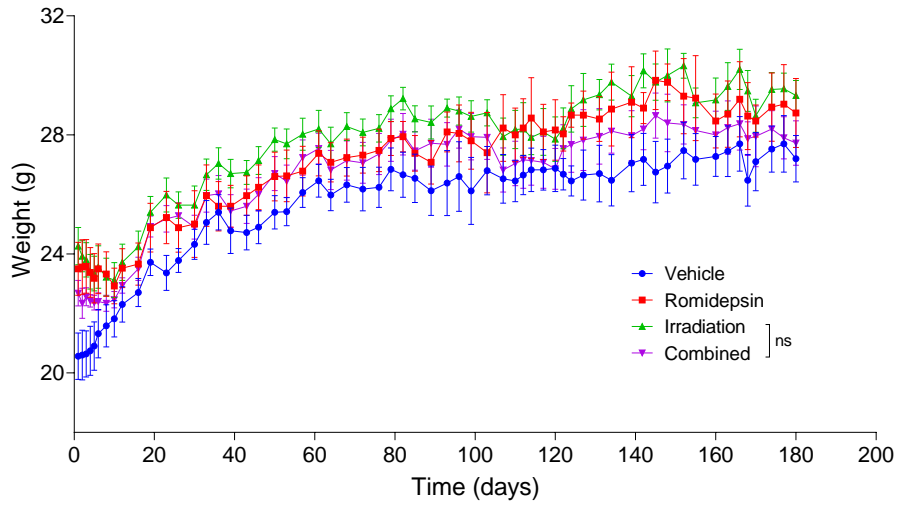

**B**

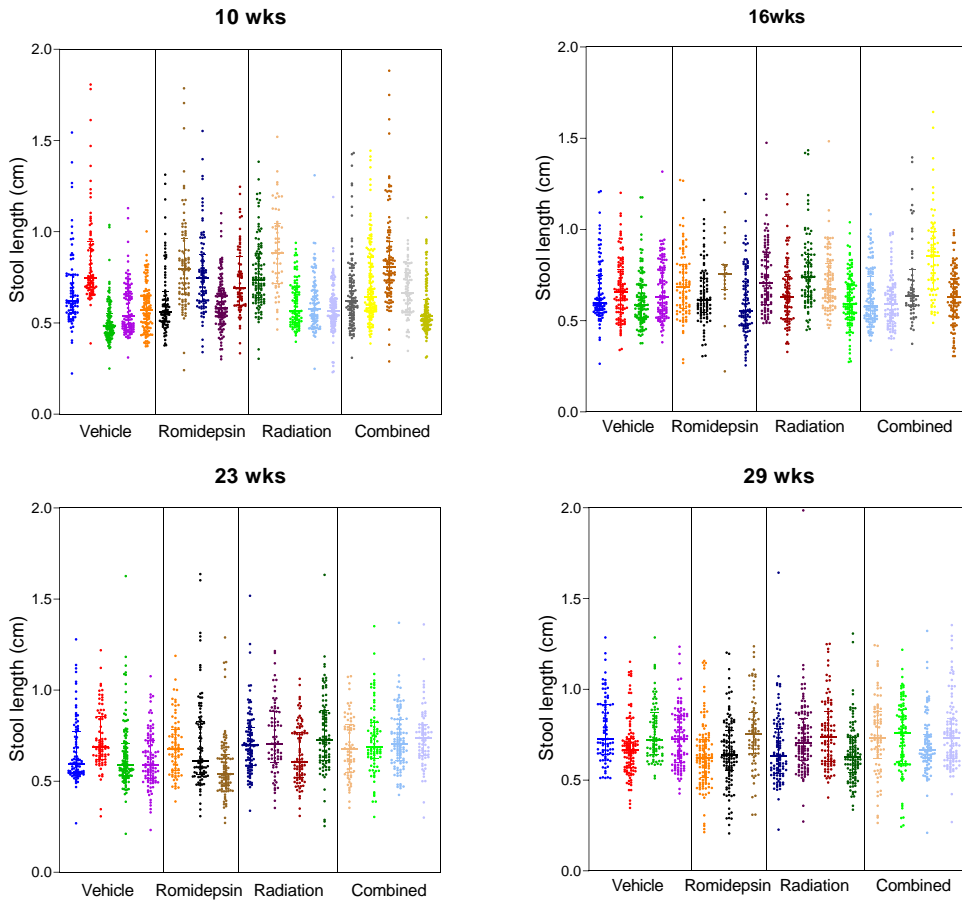

**C**

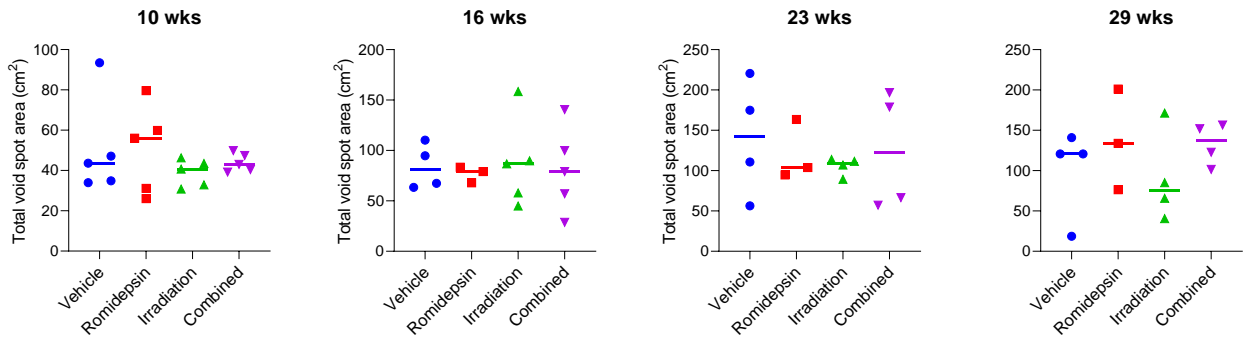

Supplement: mmc2.pdf [file mmc2.pdf]
